# Supplementary material
Source: ML conference proceedings conference paper supplement (https://proceedings.neurips.cc/paper_files/paper/2023/hash/f0552f14388d95b19740dee809f5cad1-Abstract.html)
Supplement: Supplementary file 1 [file f0552f14388d95b19740dee809f5cad1-Supplemental-Conference.pdf]

## 529 A Missing lemmas for the proof of Theorem 3.1

530 **Lemma A.1** (Daniely and Vardi [15]). *For every predicate  $P : \{0, 1\}^k \rightarrow \{0, 1\}$  and  $\mathbf{x} \in \{0, 1\}^n$ ,  
531 there is a DNF formula  $\psi$  over  $\{0, 1\}^{kn}$  with at most  $2^k$  terms, such that for every hyperedge  $S$  we  
532 have  $P_{\mathbf{x}}(\mathbf{z}^S) = \psi(\mathbf{z}^S)$ . Moreover, each term in  $\psi$  is a conjunction of positive literals.*

533 *Proof.* The following proof is from Daniely and Vardi [15], and we give it here for completeness.

534 We denote by  $\mathcal{B} \subseteq \{0, 1\}^k$  the set of satisfying assignments of  $P$ . Note that the size of  $\mathcal{B}$  is at most  
535  $2^k$ . Consider the following DNF formula over  $\{0, 1\}^{kn}$ :

$$\psi(\mathbf{z}) = \bigvee_{\mathbf{b} \in \mathcal{B}} \bigwedge_{j \in [k]} \bigwedge_{\{l: x_l \neq b_j\}} z_{j,l}.$$

536 For a hyperedge  $S = (i_1, \dots, i_k)$ , we have

$$\begin{aligned} \psi(\mathbf{z}^S) = 1 &\iff \exists \mathbf{b} \in \mathcal{B} \forall j \in [k] \forall x_l \neq b_j, z_{j,l}^S = 1 \\ &\iff \exists \mathbf{b} \in \mathcal{B} \forall j \in [k] \forall x_l \neq b_j, i_j \neq l \\ &\iff \exists \mathbf{b} \in \mathcal{B} \forall j \in [k], x_{i_j} = b_j \\ &\iff \exists \mathbf{b} \in \mathcal{B}, \mathbf{x}_S = \mathbf{b} \\ &\iff P(\mathbf{x}_S) = 1 \\ &\iff P_{\mathbf{x}}(\mathbf{z}^S) = 1. \end{aligned}$$

537 □

538 **Lemma A.2.** *Let  $\mathbf{x} \in \{0, 1\}^n$ . There exists an affine layer with at most  $2^k$  outputs, weights bounded  
539 by a constant and bias terms bounded by  $n \log(n)$  (for a sufficiently large  $n$ ), such that given an input  
540  $\mathbf{z}^S \in \{0, 1\}^{kn}$  for some hyperedge  $S$ , it satisfies the following: For  $S$  with  $P_{\mathbf{x}}(\mathbf{z}^S) = 0$  all outputs  
541 are at most  $-1$ , and for  $S$  with  $P_{\mathbf{x}}(\mathbf{z}^S) = 1$  there exists an output greater or equal to 2.*

542 *Proof.* By Lemma A.1, there exists a DNF formula  $\varphi_{\mathbf{x}}$  over  $\{0, 1\}^{kn}$  with at most  $2^k$  terms, such  
543 that  $\varphi_{\mathbf{x}}(\mathbf{z}^S) = P_{\mathbf{x}}(\mathbf{z}^S)$ . Thus, if  $P_{\mathbf{x}}(\mathbf{z}^S) = 0$  then all terms in  $\varphi_{\mathbf{x}}$  are not satisfied for the input  $\mathbf{z}^S$ ,  
544 and if  $P_{\mathbf{x}}(\mathbf{z}^S) = 1$  then there is at least one term in  $\varphi_{\mathbf{x}}$  which is satisfied for the input  $\mathbf{z}^S$ . Therefore,  
545 it suffices to construct an affine layer such that for an input  $\mathbf{z}^S$ , the  $j$ -th output will be at most  $-1$  if  
546 the  $j$ -th term of  $\varphi_{\mathbf{x}}$  is not satisfied, and at least 2 otherwise. Each term  $C_j$  in  $\varphi_{\mathbf{x}}$  is a conjunction of  
547 positive literals. Let  $I_j \subseteq [kn]$  be the indices of these literals. The  $j$ -th output of the affine layer will  
548 be

$$\left( \sum_{l \in I_j} 3z_l^S \right) - 3|I_j| + 2.$$

549 Note that if the conjunction  $C_j$  holds, then this expression is exactly  $3|I_j| - 3|I_j| + 2 = 2$ , and  
550 otherwise it is at most  $3(|I_j| - 1) - 3|I_j| + 2 = -1$ . Finally, note that all weights are bounded by 3  
551 and all bias terms are bounded by  $n \log(n)$  (for large enough  $n$ ). □

552 **Lemma A.3.** *Let  $\mathbf{x} \in \{0, 1\}^n$ . There exists a depth-2 neural network  $N_1$  with input dimension  $kn$ ,  
553  $2kn$  hidden neurons, at most  $2^k$  output neurons, and parameter magnitudes bounded by  $n^3$  (for a  
554 sufficiently large  $n$ ), which satisfies the following. We denote the set of output neurons of  $N_1$  by  $\mathcal{E}_1$ .  
555 Let  $\mathbf{z}' \in \mathbb{R}^{kn}$  be such that  $\Psi(\mathbf{z}') = \mathbf{z}^S$  for some hyperedge  $S$ , and assume that for every  $i \in [kn]$  we  
556 have  $z'_i \notin (c, c + \frac{1}{n^2})$ . Then, for  $S$  with  $P_{\mathbf{x}}(\mathbf{z}^S) = 0$  the inputs to all neurons  $\mathcal{E}_1$  are at most  $-1$ , and  
557 for  $S$  with  $P_{\mathbf{x}}(\mathbf{z}^S) = 1$  there exists a neuron in  $\mathcal{E}_1$  with input at least 2. Moreover, only the second  
558 layer of  $N_1$  depends on  $\mathbf{x}$ .*

559 *Proof.* First, we construct a depth-2 neural network  $N_{\Psi} : \mathbb{R}^{kn} \rightarrow [0, 1]^{kn}$  with a single layer of non-  
560 linearity, such that for every  $\mathbf{z}' \in \mathbb{R}^{kn}$  with  $z'_i \notin (c, c + \frac{1}{n^2})$  for every  $i \in [kn]$ , we have  $N_{\Psi}(\mathbf{z}') =$   
561  $\Psi(\mathbf{z}')$ . The network  $N_{\Psi}$  has  $2kn$  hidden neurons, and computes  $N_{\Psi}(\mathbf{z}') = (f(z'_1), \dots, f(z'_{kn}))$ ,  
562 where  $f : \mathbb{R} \rightarrow [0, 1]$  is such that

$$f(t) = n^2 \cdot \left( [t - c]_+ - \left[ t - \left( c + \frac{1}{n^2} \right) \right]_+ \right).$$

563 Note that if  $t \leq c$  then  $f(t) = 0$ , if  $t \geq c + \frac{1}{n^2}$  then  $f(t) = 1$ , and if  $c < t < c + \frac{1}{n^2}$  then  $f(t) \in (0, 1)$ .  
 564 Also, note that all weights and bias terms can be bounded by  $n^2$  (for large enough  $n$ ). Moreover, the  
 565 network  $N_\Psi$  does not depend on  $\mathbf{x}$ .

566 Let  $\mathbf{z}' \in \mathbb{R}^{kn}$  such that  $\Psi(\mathbf{z}') = \mathbf{z}^S$  for some hyperedge  $S$ , and assume that for every  $i \in [kn]$  we  
 567 have  $z'_i \notin (c, c + \frac{1}{n^2})$ . For such  $\mathbf{z}'$ , we have  $N_\Psi(\mathbf{z}') = \Psi(\mathbf{z}') = \mathbf{z}^S$ . Hence, it suffices to show that  
 568 we can construct an affine layer with at most  $2^k$  outputs, weights bounded by a constant and bias  
 569 terms bounded by  $n^3$ , such that given an input  $\mathbf{z}^S$  it satisfies the following: For  $S$  with  $P_{\mathbf{x}}(\mathbf{z}^S) = 0$   
 570 all outputs are at most  $-1$ , and for  $S$  with  $P_{\mathbf{x}}(\mathbf{z}^S) = 1$  there exists an output greater or equal to 2.  
 571 We construct such an affine layer in Lemma A.2.  $\square$

572 **Lemma A.4.** *There exists an affine layer with  $2k + n$  outputs, weights bounded by a constant and*  
 573 *bias terms bounded by  $n \log(n)$  (for a sufficiently large  $n$ ), such that given an input  $\mathbf{z} \in \{0, 1\}^{kn}$ , if*  
 574 *it is an encoding of a hyperedge then all outputs are at most  $-1$ , and otherwise there exists an output*  
 575 *greater or equal to 2.*

576 *Proof.* Note that  $\mathbf{z} \in \{0, 1\}^{kn}$  is not an encoding of a hyperedge iff at least one of the following  
 577 holds:

- 578 1. At least one of the  $k$  size- $n$  slices in  $\mathbf{z}$  contains 0 more than once.
- 579 2. At least one of the  $k$  size- $n$  slices in  $\mathbf{z}$  does not contain 0.
- 580 3. There are two size- $n$  slices in  $\mathbf{z}$  that encode the same index.

581 We define the outputs of our affine layer as follows. First, we have  $k$  outputs that correspond  
 582 to (1). In order to check whether slice  $i \in [k]$  contains 0 more than once, the output will be  
 583  $3n - 4 - (\sum_{j \in [n]} 3z_{i,j})$ . Second, we have  $k$  outputs that correspond to (2): in order to check whether  
 584 slice  $i \in [k]$  does not contain 0, the output will be  $(\sum_{j \in [n]} 3z_{i,j}) - 3n + 2$ . Finally, we have  $n$   
 585 outputs that correspond to (3): in order to check whether there are two slices that encode the same  
 586 index  $j \in [n]$ , the output will be  $3k - 4 - (\sum_{i \in [k]} 3z_{i,j})$ . Note that all weights are bounded by 3 and  
 587 all bias terms are bounded by  $n \log(n)$  for large enough  $n$ .  $\square$

588 **Lemma A.5.** *There exists a depth-2 neural network  $N_2$  with input dimension  $kn$ , at most  $2kn$  hidden*  
 589 *neurons,  $2k + n$  output neurons, and parameter magnitudes bounded by  $n^3$  (for a sufficiently large*  
 590  *$n$ ), which satisfies the following. We denote the set of output neurons of  $N_2$  by  $\mathcal{E}_2$ . Let  $\mathbf{z}' \in \mathbb{R}^{kn}$  be*  
 591 *such that for every  $i \in [kn]$  we have  $z'_i \notin (c, c + \frac{1}{n^2})$ . If  $\Psi(\mathbf{z}')$  is an encoding of a hyperedge then*  
 592 *the inputs to all neurons  $\mathcal{E}_2$  are at most  $-1$ , and otherwise there exists a neuron in  $\mathcal{E}_2$  with input at*  
 593 *least 2.*

594 *Proof.* Let  $N_\Psi : \mathbb{R}^{kn} \rightarrow [0, 1]^{kn}$  be the depth-2 neural network from the proof of Lemma A.3, with  
 595 a single layer of non-linearity with  $2kn$  hidden neurons, and parameter magnitudes bounded by  $n^2$ ,  
 596 such that for every  $\mathbf{z}' \in \mathbb{R}^{kn}$  with  $z'_i \notin (c, c + \frac{1}{n^2})$  for every  $i \in [kn]$ , we have  $N_\Psi(\mathbf{z}') = \Psi(\mathbf{z}')$ .

597 Let  $\mathbf{z}' \in \mathbb{R}^{kn}$  be such that for every  $i \in [kn]$  we have  $z'_i \notin (c, c + \frac{1}{n^2})$ . For such  $\mathbf{z}'$  we have  
 598  $N_\Psi(\mathbf{z}') = \Psi(\mathbf{z}')$ . Hence, it suffices to show that we can construct an affine layer with  $2k + n$  outputs,  
 599 weights bounded by a constant and bias terms bounded by  $n^3$ , such that given an input  $\mathbf{z} \in \{0, 1\}^{kn}$ ,  
 600 if it is an encoding of a hyperedge then all outputs are at most  $-1$ , and otherwise there exists an  
 601 output greater or equal to 2. We construct such an affine layer in Lemma A.4.  $\square$

602 **Lemma A.6.** *There exists a depth-2 neural network  $N_3$  with input dimension  $kn$ , at most  $n \log(n)$*   
 603 *hidden neurons,  $kn \leq n \log(n)$  output neurons, and parameter magnitudes bounded by  $n^3$  (for a*  
 604 *sufficiently large  $n$ ), which satisfies the following. We denote the set of output neurons of  $N_3$  by  $\mathcal{E}_3$ .*  
 605 *Let  $\mathbf{z}' \in \mathbb{R}^{kn}$ . If there exists  $i \in [kn]$  such that  $z'_i \in (c, c + \frac{1}{n^2})$  then there exists a neuron in  $\mathcal{E}_3$  with*  
 606 *input at least 2. If for all  $i \in [kn]$  we have  $z'_i \notin (c - \frac{1}{n^2}, c + \frac{2}{n^2})$  then the inputs to all neurons in  $\mathcal{E}_3$*   
 607 *are at most  $-1$ .*

608 *Proof.* It suffices to construct a univariate depth-2 network  $f : \mathbb{R} \rightarrow \mathbb{R}$  with one non-linear layer and  
 609 a constant number of hidden neurons, such that for every input  $z'_i \in (c, c + \frac{1}{n^2})$  we have  $f(z'_i) = 2$ ,  
 610 and for every  $z'_i \notin (c - \frac{1}{n^2}, c + \frac{2}{n^2})$  we have  $f(z'_i) = -1$ .

611 We construct  $f$  as follows:

$$f(z'_i) = (3n^2) \left( \left[ z'_i - \left( c - \frac{1}{n^2} \right) \right]_+ - [z'_i - c]_+ \right) - \\ (3n^2) \left( \left[ z'_i - \left( c + \frac{1}{n^2} \right) \right]_+ - \left[ z'_i - \left( c + \frac{2}{n^2} \right) \right]_+ \right) - 1.$$

612 Note that all weights and bias terms are bounded by  $n^3$  (for large enough  $n$ ).  $\square$

613 **Lemma A.7.** Let  $q = \text{poly}(n)$  and  $r = \text{poly}(n)$ . Then, there exists  $\tau = \frac{1}{\text{poly}(n)}$  such that for  
614 a sufficiently large  $n$ , with probability at least  $1 - \exp(-n/2)$  a vector  $\xi \sim \mathcal{N}(\mathbf{0}, \tau^2 I_r)$  satisfies  
615  $\|\xi\| \leq \frac{1}{q}$ .

616 *Proof.* Let  $\tau = \frac{1}{q\sqrt{2rn}}$ . Every component  $\xi_i$  in  $\xi$  has the distribution  $\mathcal{N}(0, \tau^2)$ . By a standard  
617 tail bound of the Gaussian distribution, we have for every  $i \in [r]$  and  $t \geq 0$  that  $\Pr[\xi_i \geq t] \leq$   
618  $2 \exp\left(-\frac{t^2}{2\tau^2}\right)$ . Hence, for  $t = \frac{1}{q\sqrt{r}}$ , we get

$$\Pr\left[\xi_i \geq \frac{1}{q\sqrt{r}}\right] \leq 2 \exp\left(-\frac{1}{2\tau^2 q^2 r}\right) = 2 \exp\left(-\frac{2rnq^2}{2q^2 r}\right) = 2 \exp(-n).$$

619 By the union bound, with probability at least  $1 - r \cdot 2e^{-n}$ , we have

$$\|\xi\|^2 \leq r \cdot \frac{1}{r q^2} = \frac{1}{q^2}.$$

620 Thus, for a sufficiently large  $n$ , with probability at least  $1 - \exp(-n/2)$  we have  $\|\xi\| \leq \frac{1}{q}$ .  $\square$

621 **Lemma A.8.** If  $S$  is pseudorandom then with probability at least  $\frac{39}{40}$  (over  $\xi \sim \mathcal{N}(\mathbf{0}, \tau^2 I_p)$ ) and the  
622 i.i.d. inputs  $\tilde{\mathbf{z}}_i \sim \mathcal{D}$ ) the examples  $(\tilde{\mathbf{z}}_1, \tilde{y}_1), \dots, (\tilde{\mathbf{z}}_{m(n)+n^3}, \tilde{y}_{m(n)+n^3})$  returned by the oracle are  
623 realized by  $\hat{N}$ .

624 *Proof.* By our choice of  $\tau$ , with probability at least  $1 - \frac{1}{n}$  over  $\xi \sim \mathcal{N}(\mathbf{0}, \tau^2 I_p)$ , we have  $|\xi_j| \leq \frac{1}{10}$   
625 for all  $j \in [p]$ , and for every  $\tilde{\mathbf{z}}$  with  $\|\tilde{\mathbf{z}}\| \leq 2n$  the inputs to the neurons  $\mathcal{E}_1, \mathcal{E}_2, \mathcal{E}_3$  in the computation  
626  $\hat{N}(\tilde{\mathbf{z}})$  satisfy Properties (P1) through (P3). We first show that with probability at least  $1 - \frac{1}{n}$  all  
627 examples  $\tilde{\mathbf{z}}_1, \dots, \tilde{\mathbf{z}}_{m(n)+n^3}$  satisfy  $\|\tilde{\mathbf{z}}_i\| \leq 2n$ . Hence, with probability at least  $1 - \frac{2}{n}$ , Properties (P1)  
628 through (P3) hold for the computations  $\hat{N}(\tilde{\mathbf{z}}_i)$  for all  $i \in [m(n) + n^3]$ .

629 Note that  $\|\tilde{\mathbf{z}}_i\|^2$  has the Chi-squared distribution. Since  $\tilde{\mathbf{z}}_i$  is of dimension  $n^2$ , a concentration bound  
630 by Laurent and Massart [31, Lemma 1] implies that for all  $t > 0$  we have

$$\Pr\left[\|\tilde{\mathbf{z}}_i\|^2 - n^2 \geq 2n\sqrt{t} + 2t\right] \leq e^{-t}.$$

631 Plugging-in  $t = \frac{n^2}{4}$ , we get

$$\Pr\left[\|\tilde{\mathbf{z}}_i\|^2 \geq 4n^2\right] = \Pr\left[\|\tilde{\mathbf{z}}_i\|^2 - n^2 \geq 3n^2\right] \\ \leq \Pr\left[\|\tilde{\mathbf{z}}_i\|^2 - n^2 \geq \frac{3n^2}{2}\right] \\ = \Pr\left[\|\tilde{\mathbf{z}}_i\|^2 - n^2 \geq 2n\sqrt{\frac{n^2}{4}} + 2 \cdot \frac{n^2}{4}\right] \\ \leq \exp\left(-\frac{n^2}{4}\right).$$

632 Thus, we have  $\Pr[\|\tilde{\mathbf{z}}_i\| \geq 2n] \leq \exp\left(-\frac{n^2}{4}\right)$ . By the union bound, with probability at least

$$1 - (m(n) + n^3) \exp\left(-\frac{n^2}{4}\right) \geq 1 - \frac{1}{n}$$

633 (for a sufficiently large  $n$ ), all examples  $(\tilde{\mathbf{z}}_i, \tilde{y}_i)$  satisfy  $\|\tilde{\mathbf{z}}_i\| \leq 2n$ .

634 Thus, we showed that with probability at least  $1 - \frac{2}{n} \geq \frac{39}{40}$  (for a sufficiently large  $n$ ), we have  
 635  $|\xi_j| \leq \frac{1}{10}$  for all  $j \in [p]$ , and Properties (P1) through (P3) hold for the computations  $\hat{N}(\tilde{\mathbf{z}}_i)$   
 636 for all  $i \in [m(n) + n^3]$ . It remains to show that if these properties hold, then the examples  
 637  $(\tilde{\mathbf{z}}_1, \tilde{y}_1), \dots, (\tilde{\mathbf{z}}_{m(n)+n^3}, \tilde{y}_{m(n)+n^3})$  are realized by  $\hat{N}$ .

638 Let  $i \in [m(n) + n^3]$ . For brevity, we denote  $\tilde{\mathbf{z}} = \tilde{\mathbf{z}}_i$ ,  $\tilde{y} = \tilde{y}_i$ , and  $\mathbf{z}' = \tilde{\mathbf{z}}_{[kn]}$ . Since  $|\xi_j| \leq \frac{1}{10}$  for all  
 639  $j \in [p]$ , and all incoming weights to the output neuron in  $\hat{N}$  are  $-1$ , then in  $\hat{N}$  all incoming weights  
 640 to the output neuron are in  $[-\frac{11}{10}, -\frac{9}{10}]$ , and the bias term in the output neuron, denoted by  $\hat{b}$ , is in  
 641  $[\frac{9}{10}, \frac{11}{10}]$ . Consider the following cases:

- 642 • If  $\Psi(\mathbf{z}')$  is not an encoding of a hyperedge then  $\tilde{y} = 0$ , and  $\hat{N}(\tilde{\mathbf{z}})$  satisfies:
  - 643 1. If  $\mathbf{z}'$  does not have components in  $(c, c + \frac{1}{n})$ , then there exists a neuron in  $\mathcal{E}_2$  with  
 644 output at least  $\frac{3}{2}$  (by Property (P2)).
  - 645 2. If  $\mathbf{z}'$  has a component in  $(c, c + \frac{1}{n})$ , then there exists a neuron in  $\mathcal{E}_3$  with output at least  
 646  $\frac{3}{2}$  (by Property (P3)).

647 In both cases, since all incoming weights to the output neuron in  $\hat{N}$  are in  $[-\frac{11}{10}, -\frac{9}{10}]$ ,  
 648 and  $\hat{b} \in [\frac{9}{10}, \frac{11}{10}]$ , then the input to the output neuron (including the bias term) is at most  
 649  $\frac{11}{10} - \frac{3}{2} \cdot \frac{9}{10} < 0$ , and thus its output is 0.

- 650 • If  $\Psi(\mathbf{z}')$  is an encoding of a hyperedge  $S$ , then by the definition of the examples oracle we  
 651 have  $S = S_i$ . Hence:

- 652 – If  $\mathbf{z}'$  does not have components in  $(c - \frac{1}{n^2}, c + \frac{2}{n^2})$ , then:
  - 653 \* If  $y_i = 0$  then the oracle sets  $\tilde{y} = \hat{b}$ . Since  $\mathcal{S}$  is pseudorandom, we have  $P_{\mathbf{x}}(\mathbf{z}^S) =$   
 654  $P_{\mathbf{x}}(\mathbf{z}^{S_i}) = y_i = 0$ . Hence, in the computation  $\hat{N}(\tilde{\mathbf{z}})$  the inputs to all neurons in  
 655  $\mathcal{E}_1, \mathcal{E}_2, \mathcal{E}_3$  are at most  $-\frac{1}{2}$  (by Properties (P1), (P2) and (P3)), and thus their outputs  
 656 are 0. Therefore,  $\hat{N}(\tilde{\mathbf{z}}) = \hat{b}$ .
  - 657 \* If  $y_i = 1$  then the oracle sets  $\tilde{y} = 0$ . Since  $\mathcal{S}$  is pseudorandom, we have  $P_{\mathbf{x}}(\mathbf{z}^S) =$   
 658  $P_{\mathbf{x}}(\mathbf{z}^{S_i}) = y_i = 1$ . Hence, in the computation  $\hat{N}(\tilde{\mathbf{z}})$  there exists a neuron in  $\mathcal{E}_1$   
 659 with output at least  $\frac{3}{2}$  (by Property (P1)). Since all incoming weights to the output  
 660 neuron in  $\hat{N}$  are in  $[-\frac{11}{10}, -\frac{9}{10}]$ , and  $\hat{b} \in [\frac{9}{10}, \frac{11}{10}]$ , then the input to output neuron  
 661 (including the bias term) is at most  $\frac{11}{10} - \frac{3}{2} \cdot \frac{9}{10} < 0$ , and thus its output is 0.
- 662 – If  $\mathbf{z}'$  has a component in  $(c, c + \frac{1}{n^2})$ , then  $\tilde{y} = 0$ . Also, in the computation  $\hat{N}(\tilde{\mathbf{z}})$  there  
 663 exists a neuron in  $\mathcal{E}_3$  with output at least  $\frac{3}{2}$  (by Property (P3)). Since all incoming  
 664 weights to the output neuron in  $\hat{N}$  are in  $[-\frac{11}{10}, -\frac{9}{10}]$ , and  $\hat{b} \in [\frac{9}{10}, \frac{11}{10}]$ , then the input  
 665 to output neuron (including the bias term) is at most  $\frac{11}{10} - \frac{3}{2} \cdot \frac{9}{10} < 0$ , and thus its  
 666 output is 0.
- 667 – If  $\mathbf{z}'$  does not have components in the interval  $(c, c + \frac{1}{n^2})$ , but has a component in the  
 668 interval  $(c - \frac{1}{n^2}, c + \frac{2}{n^2})$ , then:
  - 669 \* If  $y_i = 1$  the oracle sets  $\tilde{y} = 0$ . Since  $\mathcal{S}$  is pseudorandom, we have  $P_{\mathbf{x}}(\mathbf{z}^S) =$   
 670  $P_{\mathbf{x}}(\mathbf{z}^{S_i}) = y_i = 1$ . Hence, in the computation  $\hat{N}(\tilde{\mathbf{z}})$  there exists a neuron in  $\mathcal{E}_1$   
 671 with output at least  $\frac{3}{2}$  (by Property (P1)). Since all incoming weights to the output  
 672 neuron in  $\hat{N}$  are in  $[-\frac{11}{10}, -\frac{9}{10}]$ , and  $\hat{b} \in [\frac{9}{10}, \frac{11}{10}]$ , then the input to output neuron  
 673 (including the bias term) is at most  $\frac{11}{10} - \frac{3}{2} \cdot \frac{9}{10} < 0$ , and thus its output is 0.
  - 674 \* If  $y_i = 0$  the oracle sets  $\tilde{y} = [\hat{b} - \hat{N}_3(\tilde{\mathbf{z}})]_+$ . Since  $\mathcal{S}$  is pseudorandom, we have  
 675  $P_{\mathbf{x}}(\mathbf{z}^S) = P_{\mathbf{x}}(\mathbf{z}^{S_i}) = y_i = 0$ . Therefore, in the computation  $\hat{N}(\tilde{\mathbf{z}})$  all neurons in  
 676  $\mathcal{E}_1, \mathcal{E}_2$  have output 0 (by Properties (P1) and (P2)), and hence their contribution to  
 677 the output of  $\hat{N}$  is 0. Thus, by the definition of  $\hat{N}_3$ , we have  $\hat{N}(\tilde{\mathbf{z}}) = [\hat{b} - \hat{N}_3(\tilde{\mathbf{z}})]_+$ .

678 □

679 **Lemma A.9.** *If  $\mathcal{S}$  is pseudorandom, then for a sufficiently large  $n$ , with probability greater than  $\frac{2}{3}$*   
 680 *we have*

$$\ell_I(h') \leq \frac{2}{n}.$$

681 *Proof.* By Lemma A.8, if  $\mathcal{S}$  is pseudorandom then with probability at least  $\frac{39}{40}$  (over  $\xi \sim \mathcal{N}(\mathbf{0}, \tau^2 I_p)$ )  
 682 and the i.i.d. inputs  $\tilde{\mathbf{z}}_i \sim \mathcal{D}$ ) the examples  $(\tilde{\mathbf{z}}_1, \tilde{y}_1), \dots, (\tilde{\mathbf{z}}_{m(n)}, \tilde{y}_{m(n)})$  returned by the oracle  
 683 are realized by  $\hat{N}$ . Recall that the algorithm  $\mathcal{L}$  is such that with probability at least  $\frac{3}{4}$  (over  $\xi \sim$   
 684  $\mathcal{N}(\mathbf{0}, \tau^2 I_p)$ , the i.i.d. inputs  $\tilde{\mathbf{z}}_i \sim \mathcal{D}$ , and possibly its internal randomness), given a size- $m(n)$   
 685 dataset labeled by  $\hat{N}$ , it returns a hypothesis  $h$  such that  $\mathbb{E}_{\tilde{\mathbf{z}} \sim \mathcal{D}} [(h(\tilde{\mathbf{z}}) - \hat{N}(\tilde{\mathbf{z}}))^2] \leq \frac{1}{n}$ . Hence, with  
 686 probability at least  $\frac{3}{4} - \frac{1}{40}$  the algorithm  $\mathcal{L}$  returns such a good hypothesis  $h$ , given  $m(n)$  examples  
 687 labeled by our examples oracle. Indeed, note that  $\mathcal{L}$  can return a bad hypothesis only if the random  
 688 choices are either bad for  $\mathcal{L}$  (when used with realizable examples) or bad for the realizability of the  
 689 examples returned by our oracle. By the definition of  $h'$  and the construction of  $\hat{N}$ , if  $h$  has small  
 690 error then  $h'$  also has small error, namely,

$$\mathbb{E}_{\tilde{\mathbf{z}} \sim \mathcal{D}} [(h'(\tilde{\mathbf{z}}) - \hat{N}(\tilde{\mathbf{z}}))^2] \leq \mathbb{E}_{\tilde{\mathbf{z}} \sim \mathcal{D}} [(h(\tilde{\mathbf{z}}) - \hat{N}(\tilde{\mathbf{z}}))^2] \leq \frac{1}{n}.$$

691 Let  $\hat{\ell}_I(h') = \frac{1}{|I|} \sum_{i \in I} (h'(\tilde{\mathbf{z}}_i) - \hat{N}(\tilde{\mathbf{z}}_i))^2$ . Recall that by our choice of  $\tau$  we have  $\Pr[\hat{b} > \frac{11}{10}] \leq \frac{1}{n}$ .  
 692 Since,  $(h'(\tilde{\mathbf{z}}) - \hat{N}(\tilde{\mathbf{z}}))^2 \in [0, \hat{b}^2]$  for all  $\tilde{\mathbf{z}} \in \mathbb{R}^{n^2}$ , by Hoeffding's inequality, we have for a sufficiently  
 693 large  $n$  that

$$\begin{aligned} \Pr \left[ \left| \hat{\ell}_I(h') - \mathbb{E}_{\tilde{\mathbf{S}}_I} \hat{\ell}_I(h') \right| \geq \frac{1}{n} \right] &= \Pr \left[ \left| \hat{\ell}_I(h') - \mathbb{E}_{\tilde{\mathbf{S}}_I} \hat{\ell}_I(h') \right| \geq \frac{1}{n} \mid \hat{b} \leq \frac{11}{10} \right] \cdot \Pr \left[ \hat{b} \leq \frac{11}{10} \right] \\ &\quad + \Pr \left[ \left| \hat{\ell}_I(h') - \mathbb{E}_{\tilde{\mathbf{S}}_I} \hat{\ell}_I(h') \right| \geq \frac{1}{n} \mid \hat{b} > \frac{11}{10} \right] \cdot \Pr \left[ \hat{b} > \frac{11}{10} \right] \\ &\leq 2 \exp \left( -\frac{2n^3}{n^2(11/10)^4} \right) \cdot 1 + 1 \cdot \frac{1}{n} \\ &\leq \frac{1}{40}. \end{aligned}$$

694 Moreover, by Lemma A.8,

$$\Pr [\ell_I(h') \neq \hat{\ell}_I(h')] \leq \Pr [\exists i \in I \text{ s.t. } \tilde{y}_i \neq \hat{N}(\tilde{\mathbf{z}}_i)] \leq \frac{1}{40}.$$

695 Overall, by the union bound we have with probability at least  $1 - (\frac{1}{4} + \frac{1}{40} + \frac{1}{40} + \frac{1}{40}) > \frac{2}{3}$  for  
 696 sufficiently large  $n$  that:

- 697 •  $\mathbb{E}_{\tilde{\mathbf{S}}_I} \hat{\ell}_I(h') = \mathbb{E}_{\tilde{\mathbf{z}} \sim \mathcal{D}} [(h'(\tilde{\mathbf{z}}) - \hat{N}(\tilde{\mathbf{z}}))^2] \leq \frac{1}{n}$ .
- 698 •  $\left| \hat{\ell}_I(h') - \mathbb{E}_{\tilde{\mathbf{S}}_I} \hat{\ell}_I(h') \right| \leq \frac{1}{n}$ .
- 699 •  $\ell_I(h') - \hat{\ell}_I(h') = 0$ .

700 Combining the above, we get that if  $\mathcal{S}$  is pseudorandom, then with probability greater than  $\frac{2}{3}$  we have

$$\ell_I(h') = \left( \ell_I(h') - \hat{\ell}_I(h') \right) + \left( \hat{\ell}_I(h') - \mathbb{E}_{\tilde{\mathbf{S}}_I} \hat{\ell}_I(h') \right) + \mathbb{E}_{\tilde{\mathbf{S}}_I} \hat{\ell}_I(h') \leq 0 + \frac{1}{n} + \frac{1}{n} = \frac{2}{n}.$$

701 □

702 **Lemma A.10.** *Let  $\mathbf{z} \in \{0, 1\}^{kn}$  be a random vector whose components are drawn i.i.d. from a*  
 703 *Bernoulli distribution, which takes the value 0 with probability  $\frac{1}{n}$ . Then, for a sufficiently large  $n$ , the*  
 704 *vector  $\mathbf{z}$  is an encoding of a hyperedge with probability at least  $\frac{1}{\log(n)}$ .*

705 *Proof.* The vector  $\mathbf{z}$  represents a hyperedge iff in each of the  $k$  size- $n$  slices in  $\mathbf{z}$  there is exactly one  
 706 0-bit and each two of the  $k$  slices in  $\mathbf{z}$  encode different indices. Hence,

$$\begin{aligned}\Pr[\mathbf{z} \text{ represents a hyperedge}] &= n \cdot (n-1) \cdot \dots \cdot (n-k+1) \cdot \left(\frac{1}{n}\right)^k \left(\frac{n-1}{n}\right)^{nk-k} \\ &\geq \left(\frac{n-k}{n}\right)^k \left(\frac{n-1}{n}\right)^{k(n-1)} \\ &= \left(1 - \frac{k}{n}\right)^k \left(1 - \frac{1}{n}\right)^{k(n-1)}.\end{aligned}$$

707 Since for every  $x \in (0, 1)$  we have  $e^{-x} < 1 - \frac{x}{2}$ , then for a sufficiently large  $n$  the above is at least

$$\exp\left(-\frac{2k^2}{n}\right) \cdot \exp\left(-\frac{2k(n-1)}{n}\right) \geq \exp(-1) \cdot \exp(-2k) \geq \frac{1}{\log(n)}.$$

708 □

709 **Lemma A.11.** Let  $\tilde{\mathbf{z}} \in \mathbb{R}^{n^2}$  be the vector returned by the oracle. We have

$$\Pr[\tilde{\mathbf{z}} \in \tilde{\mathcal{Z}}] \geq \frac{1}{2\log(n)}.$$

710 *Proof.* Let  $\mathbf{z}' = \tilde{\mathbf{z}}_{[kn]}$ . We have

$$\begin{aligned}\Pr[\tilde{\mathbf{z}} \notin \tilde{\mathcal{Z}}] &\leq \Pr\left[\exists j \in [kn] \text{ s.t. } z'_j \in \left(c - \frac{1}{n^2}, c + \frac{2}{n^2}\right)\right] \\ &\quad + \Pr[\Psi(\mathbf{z}') \text{ does not represent a hyperedge}].\end{aligned}\tag{1}$$

711 We now bound the terms in the above RHS. First, since  $\mathbf{z}'$  has the Gaussian distribution, then its  
 712 components are drawn i.i.d. from a density function bounded by  $\frac{1}{2\pi}$ . Hence, for a sufficiently large  $n$   
 713 we have

$$\Pr\left[\exists j \in [kn] \text{ s.t. } z'_j \in \left(c - \frac{1}{n^2}, c + \frac{2}{n^2}\right)\right] \leq kn \cdot \frac{1}{2\pi} \cdot \frac{3}{n^2} = \frac{3k}{2\pi n} \leq \frac{\log(n)}{n}.\tag{2}$$

714 Let  $\mathbf{z} = \Psi(\mathbf{z}')$ . Note that  $\mathbf{z}$  is a random vector whose components are drawn i.i.d. from a Bernoulli  
 715 distribution, where the probability to get 0 is  $\frac{1}{n}$ . By Lemma A.10,  $\mathbf{z}$  is an encoding of a hyperedge  
 716 with probability at least  $\frac{1}{\log(n)}$ . Combining it with Eq. (1) and (2), we get for a sufficiently large  $n$   
 717 that

$$\Pr[\tilde{\mathbf{z}} \notin \tilde{\mathcal{Z}}] \leq \frac{\log(n)}{n} + \left(1 - \frac{1}{\log(n)}\right) \leq 1 - \frac{1}{2\log(n)},$$

718 as required. □

719 **Lemma A.12.** If  $\mathcal{S}$  is random, then for a sufficiently large  $n$  with probability larger than  $\frac{2}{3}$  we have

$$\ell_I(h') > \frac{2}{n}.$$

720 *Proof.* Let  $\tilde{\mathcal{Z}} \subseteq \mathbb{R}^{n^2}$  be such that  $\tilde{\mathbf{z}} \in \tilde{\mathcal{Z}}$  iff  $\tilde{\mathbf{z}}_{[kn]}$  does not have components in the interval  
 721  $(c - \frac{1}{n^2}, c + \frac{2}{n^2})$ , and  $\Psi(\tilde{\mathbf{z}}_{[kn]}) = \mathbf{z}^S$  for a hyperedge  $S$ . If  $\mathcal{S}$  is random, then by the definition of  
 722 our examples oracle, for every  $i \in [m(n) + n^3]$  such that  $\tilde{\mathbf{z}}_i \in \tilde{\mathcal{Z}}$ , we have  $\tilde{y}_i = \hat{b}$  with probability  $\frac{1}{2}$   
 723 and  $\tilde{y}_i = 0$  otherwise. Also, by the definition of the oracle,  $\tilde{y}_i$  is independent of  $S_i$  and independent  
 724 of the choice of the vector  $\tilde{\mathbf{z}}_i$  that corresponds to  $\mathbf{z}^{S_i}$ . If  $\hat{b} \geq \frac{9}{10}$  then for a sufficiently large  $n$  the

725 hypothesis  $h'$  satisfies for each random example  $(\tilde{\mathbf{z}}_i, \tilde{y}_i) \in \tilde{\mathcal{S}}_I$  the following

$$\begin{aligned}
& \Pr_{(\tilde{\mathbf{z}}_i, \tilde{y}_i)} \left[ (h'(\tilde{\mathbf{z}}_i) - \tilde{y}_i)^2 \geq \frac{1}{5} \right] \\
& \geq \Pr_{(\tilde{\mathbf{z}}_i, \tilde{y}_i)} \left[ (h'(\tilde{\mathbf{z}}_i) - \tilde{y}_i)^2 \geq \frac{1}{5} \mid \tilde{\mathbf{z}}_i \in \tilde{\mathcal{Z}} \right] \cdot \Pr_{\tilde{\mathbf{z}}_i} [\tilde{\mathbf{z}}_i \in \tilde{\mathcal{Z}}] \\
& \geq \Pr_{(\tilde{\mathbf{z}}_i, \tilde{y}_i)} \left[ (h'(\tilde{\mathbf{z}}_i) - \tilde{y}_i)^2 \geq \left( \frac{\hat{b}}{2} \right)^2 \mid \tilde{\mathbf{z}}_i \in \tilde{\mathcal{Z}} \right] \cdot \Pr_{\tilde{\mathbf{z}}_i} [\tilde{\mathbf{z}}_i \in \tilde{\mathcal{Z}}] \\
& \geq \frac{1}{2} \cdot \Pr_{\tilde{\mathbf{z}}_i} [\tilde{\mathbf{z}}_i \in \tilde{\mathcal{Z}}] .
\end{aligned}$$

726 In Lemma A.11, we show that  $\Pr_{\tilde{\mathbf{z}}_i} [\tilde{\mathbf{z}}_i \in \tilde{\mathcal{Z}}] \geq \frac{1}{2 \log(n)}$ . Hence,

$$\Pr_{(\tilde{\mathbf{z}}_i, \tilde{y}_i)} \left[ (h'(\tilde{\mathbf{z}}_i) - \tilde{y}_i)^2 \geq \frac{1}{5} \right] \geq \frac{1}{2} \cdot \frac{1}{2 \log(n)} \geq \frac{1}{4 \log(n)} .$$

727 Thus, if  $\hat{b} \geq \frac{9}{10}$  then we have

$$\mathbb{E}_{\tilde{\mathcal{S}}_I} [\ell_I(h')] \geq \frac{1}{5} \cdot \frac{1}{4 \log(n)} = \frac{1}{20 \log(n)} .$$

728 Therefore, for large  $n$  we have

$$\Pr \left[ \mathbb{E}_{\tilde{\mathcal{S}}_I} [\ell_I(h')] \geq \frac{1}{20 \log(n)} \right] \geq 1 - \frac{1}{n} \geq \frac{7}{8} .$$

729 Since,  $(h'(\tilde{\mathbf{z}}) - \tilde{y})^2 \in [0, \hat{b}^2]$  for all  $\tilde{\mathbf{z}}, \tilde{y}$  returned by the examples oracle, and the examples  $\tilde{\mathbf{z}}_i$  for  
730  $i \in I$  are i.i.d., then by Hoeffding's inequality, we have for a sufficiently large  $n$  that

$$\begin{aligned}
\Pr \left[ \left| \ell_I(h') - \mathbb{E}_{\tilde{\mathcal{S}}_I} \ell_I(h') \right| \geq \frac{1}{n} \right] &= \Pr \left[ \left| \ell_I(h') - \mathbb{E}_{\tilde{\mathcal{S}}_I} \ell_I(h') \right| \geq \frac{1}{n} \mid \hat{b} \leq \frac{11}{10} \right] \cdot \Pr \left[ \hat{b} \leq \frac{11}{10} \right] \\
&\quad + \Pr \left[ \left| \ell_I(h') - \mathbb{E}_{\tilde{\mathcal{S}}_I} \ell_I(h') \right| \geq \frac{1}{n} \mid \hat{b} > \frac{11}{10} \right] \cdot \Pr \left[ \hat{b} > \frac{11}{10} \right] \\
&\leq 2 \exp \left( -\frac{2n^3}{n^2(11/10)^4} \right) \cdot 1 + 1 \cdot \frac{1}{n} \\
&\leq \frac{1}{8} .
\end{aligned}$$

731 Hence, for large enough  $n$ , with probability at least  $1 - \frac{1}{8} - \frac{1}{8} = \frac{3}{4} > \frac{2}{3}$  we have both  $\mathbb{E}_{\tilde{\mathcal{S}}_I} [\ell_I(h')] \geq$   
732  $\frac{1}{20 \log(n)}$  and  $|\ell_I(h') - \mathbb{E}_{\tilde{\mathcal{S}}_I} \ell_I(h')| \leq \frac{1}{n}$ , and thus

$$\ell_I(h') \geq \frac{1}{20 \log(n)} - \frac{1}{n} > \frac{2}{n} .$$

733

□

## 734 B Proof of Corollary 3.1

735 By the proof of Theorem 3.1, under Assumption 2.1, there is no  $\text{poly}(d)$ -time algorithm  $\mathcal{L}_s$  that  
736 satisfies the following: Let  $\boldsymbol{\theta} \in \mathbb{R}^p$  be  $B$ -bounded parameters of a depth-3 network  $N_{\boldsymbol{\theta}} : \mathbb{R}^d \rightarrow \mathbb{R}$ ,  
737 and let  $\tau, \epsilon > 0$ . Assume that  $p, B, 1/\epsilon, 1/\tau \leq \text{poly}(d)$ , and that the widths of the hidden layers in  
738  $\mathcal{N}_{\boldsymbol{\theta}}$  are  $d$  (i.e., the weight matrices are square). Let  $\boldsymbol{\xi} \in \mathcal{N}(\mathbf{0}, \tau^2 I_p)$  and let  $\hat{\boldsymbol{\theta}} = \boldsymbol{\theta} + \boldsymbol{\xi}$ . Then, with  
739 probability at least  $\frac{3}{4} - \frac{1}{1000}$ , given access to an examples oracle for  $\mathcal{N}_{\hat{\boldsymbol{\theta}}}$ , the algorithm  $\mathcal{L}_s$  returns a  
740 hypothesis  $h$  with  $\mathbb{E}_{\mathbf{x}} [(h(\mathbf{x}) - N_{\hat{\boldsymbol{\theta}}})^2] \leq \epsilon$ .

741 Note that in the above, the requirements from  $\mathcal{L}_s$  are somewhat weaker than in our original definition  
742 of learning with smoothed parameters. Indeed, we assume that the widths of the hidden layers are  
743  $d$  and the required success probability is only  $\frac{3}{4} - \frac{1}{1000}$  (rather than  $\frac{3}{4}$ ). We now explain why the  
744 hardness result holds already under these conditions:

- Note that if we change the assumption on the learning algorithm in proof of Theorem 3.1 such that it succeeds with probability at least  $\frac{3}{4} - \frac{1}{1000}$  (rather than  $\frac{3}{4}$ ), then in the case where  $\mathcal{S}$  is pseudorandom we get that the algorithm  $\mathcal{A}$  returns 1 with probability at least  $1 - (\frac{1}{4} + \frac{1}{1000} + \frac{1}{40} + \frac{1}{40} + \frac{1}{40})$  (see the proof of Lemma A.9), which is still greater than  $\frac{2}{3}$ . Also, the analysis of the case where  $\mathcal{S}$  is random does not change, and thus in this case  $\mathcal{A}$  returns 0 with probability greater than  $\frac{2}{3}$ . Consequently, we still get distinguishing advantage greater than  $\frac{1}{3}$ .
- Regarding the requirement on the widths, we note that in the proof of Theorem 3.1 the layers satisfy the following. The input dimension is  $d = n^2$ , the width of the first hidden layer is at most  $3n \log(n) \leq d$ , and the width of the second hidden layer is at most  $\log(n) + 2n + n \log(n) \leq d$  (all bounds are for a sufficiently large  $d$ ). In order to get a network where all layers are of width  $d$ , we add new neurons to the hidden layers, with incoming weights 0, outgoing weights 0, and bias terms  $-1$ . Then, for an appropriate choice of  $\tau = 1/\text{poly}(n)$ , even in the perturbed network the outputs of these new neurons will be 0 w.h.p. for every input  $\tilde{\mathbf{z}}_1, \dots, \tilde{\mathbf{z}}_{m(n)+n^3}$ , and thus they will not affect the network's output. Thus, using the same argument as in the proof of Theorem 3.1, we conclude that the hardness results holds already for network with square weight matrices.

Suppose that there exists an efficient algorithm  $\mathcal{L}_p$  that learns in the standard PAC framework depth-3 neural networks where the minimal singular value of each weight matrix is lower bounded by  $1/q(d)$  for any polynomial  $q(d)$ . We will use  $\mathcal{L}_p$  to obtain an efficient algorithm  $\mathcal{L}_s$  that learns depth-3 networks with smoothed parameters as described above, and thus reach a contradiction.

Let  $\boldsymbol{\theta} \in \mathbb{R}^p$  be  $B$ -bounded parameters of a depth-3 network  $N_{\boldsymbol{\theta}} : \mathbb{R}^d \rightarrow \mathbb{R}$ , and let  $\tau, \epsilon > 0$ . Assume that  $p, B, 1/\epsilon, 1/\tau \leq \text{poly}(d)$ , and that the widths of the hidden layers in  $N_{\boldsymbol{\theta}}$  are  $d$ . For random  $\boldsymbol{\xi} \sim \mathcal{N}(\mathbf{0}, \tau^2 I_p)$  and  $\hat{\boldsymbol{\theta}} = \boldsymbol{\theta} + \boldsymbol{\xi}$ , the algorithm  $\mathcal{L}_s$  has access to examples labeled by  $N_{\hat{\boldsymbol{\theta}}}$ . Using Lemma B.1 below with  $t = \frac{\tau}{d}$  and the union bound over the two weight matrices in  $N_{\boldsymbol{\theta}}$ , we get that with probability at least  $1 - \frac{2 \cdot 2.35}{\sqrt{d}} \geq 1 - \frac{1}{1000}$  (for large enough  $d$ ), the minimal singular values of all weight matrices in  $\hat{\boldsymbol{\theta}}$  are at least  $\frac{\tau}{d} \geq \frac{1}{q(d)}$  for some sufficiently large polynomial  $q(d)$ . Our algorithm  $\mathcal{L}_s$  will simply run  $\mathcal{L}_p$ . Given that the minimal singular values of the weight matrices are at least  $\frac{1}{q(d)}$ , the algorithm  $\mathcal{L}_p$  runs in time  $\text{poly}(d)$  and returns with probability at least  $\frac{3}{4}$  a hypothesis  $h$  with  $\mathbb{E}_{\mathbf{x}} [(h(\mathbf{x}) - N_{\hat{\boldsymbol{\theta}}}(\mathbf{x}))^2] \leq \epsilon$ . Overall, the algorithm  $\mathcal{L}_s$  runs in  $\text{poly}(d)$  time, and with probability at least  $\frac{3}{4} - \frac{1}{1000}$  (over both  $\boldsymbol{\xi}$  and the internal randomness) returns a hypothesis  $h$  with loss at most  $\epsilon$ .

**Lemma B.1** (Sankar et al. [35], Theorem 3.3). *Let  $W$  be an arbitrary square matrix in  $\mathbb{R}^{d \times d}$ , and let  $P \in \mathbb{R}^{d \times d}$  be a random matrix, where each entry is drawn i.i.d. from  $\mathcal{N}(0, \tau^2)$  for some  $\tau > 0$ . Let  $\sigma_d$  be the minimal singular value of the matrix  $W + P$ . Then, for every  $t > 0$  we have*

$$\Pr_P [\sigma_d \leq t] \leq 2.35 \cdot \frac{t\sqrt{d}}{\tau}.$$

## C Proof of Theorem 3.2

The proof follows similar ideas to the proof of Theorem 3.1. The main difference is that we need to handle here a smoothed discrete input distribution rather than the standard Gaussian distribution.

For a sufficiently large  $n$ , let  $\mathcal{D}$  be a distribution on  $\{0, 1\}^{n^2}$ , where each component is drawn i.i.d. from a Bernoulli distribution which takes the value 0 with probability  $\frac{1}{n}$ . Assume that there is a  $\text{poly}(n)$ -time algorithm  $\mathcal{L}$  that learns depth-3 neural networks with at most  $n^2$  hidden neurons and parameter magnitudes bounded by  $n^3$ , with smoothed parameters and inputs, under the distribution  $\mathcal{D}$ , with  $\epsilon = \frac{1}{n}$  and  $\tau, \omega = 1/\text{poly}(n)$  that we will specify later. Let  $m(n) \leq \text{poly}(n)$  be the sample complexity of  $\mathcal{L}$ , namely,  $\mathcal{L}$  uses a sample of size at most  $m(n)$  and returns with probability at least  $\frac{3}{4}$  a hypothesis  $h$  with  $\mathbb{E}_{\mathbf{z} \sim \hat{\mathcal{D}}} [(h(\mathbf{z}) - N_{\hat{\boldsymbol{\theta}}}(\mathbf{z}))^2] \leq \epsilon = \frac{1}{n}$ . Note that  $\hat{\mathcal{D}}$  is the distribution  $\mathcal{D}$  after smoothing with parameter  $\omega$ , and the vector  $\hat{\boldsymbol{\theta}}$  is the parameters of the target network after smoothing with parameter  $\tau$ . Let  $s > 1$  be a constant such that  $n^s \geq m(n) + n^3$  for every sufficiently large  $n$ . By Assumption 2.1, there exists a constant  $k$  and a predicate  $P : \{0, 1\}^k \rightarrow \{0, 1\}$ , such that  $\mathcal{F}_{P, n, n^s}$

792 is  $\frac{1}{3}$ -PRG. We will show an efficient algorithm  $\mathcal{A}$  with distinguishing advantage greater than  $\frac{1}{3}$  and  
 793 thus reach a contradiction.

794 Throughout this proof, we will use some notations from the proof of Theorem 3.1. We repeat it  
 795 here for convenience. For a hyperedge  $S = (i_1, \dots, i_k)$  we denote by  $\mathbf{z}^S \in \{0, 1\}^{kn}$  the following  
 796 encoding of  $S$ : the vector  $\mathbf{z}^S$  is a concatenation of  $k$  vectors in  $\{0, 1\}^n$ , such that the  $j$ -th vector  
 797 has 0 in the  $i_j$ -th coordinate and 1 elsewhere. Thus,  $\mathbf{z}^S$  consists of  $k$  size- $n$  slices, each encoding  
 798 a member of  $S$ . For  $\mathbf{z} \in \{0, 1\}^{kn}$ ,  $i \in [k]$  and  $j \in [n]$ , we denote  $z_{i,j} = z_{(i-1)n+j}$ . That is,  $z_{i,j}$  is  
 799 the  $j$ -th component in the  $i$ -th slice in  $\mathbf{z}$ . For  $\mathbf{x} \in \{0, 1\}^n$ , let  $P_{\mathbf{x}} : \{0, 1\}^{kn} \rightarrow \{0, 1\}$  be such that  
 800 for every hyperedge  $S$  we have  $P_{\mathbf{x}}(\mathbf{z}^S) = P(\mathbf{x}_S)$ . For  $\tilde{\mathbf{z}} \in \mathbb{R}^{n^2}$  we denote  $\tilde{\mathbf{z}}_{[kn]} = (\tilde{z}_1, \dots, \tilde{z}_{kn})$ ,  
 801 namely, the first  $kn$  components of  $\tilde{\mathbf{z}}$  (assuming  $n^2 \geq kn$ ).

## 802 C.1 Defining the target network for $\mathcal{L}$

803 Since our goal is to use the algorithm  $\mathcal{L}$  for breaking PRGs, in this subsection we define a neural  
 804 network  $\tilde{N} : \mathbb{R}^{n^2} \rightarrow \mathbb{R}$  that we will later use as a target network for  $\mathcal{L}$ . The network  $\tilde{N}$  contains the  
 805 subnetworks  $N_1, N_2$  that we define below.

806 Let  $N_1$  be a depth-1 neural network (i.e., one layer, with activations in the output neurons) with input  
 807 dimension  $kn$ , at most  $\log(n)$  output neurons, and parameter magnitudes bounded by  $n^3$  (all bounds  
 808 are for a sufficiently large  $n$ ), which satisfies the following. We denote the set of output neurons of  
 809  $N_1$  by  $\mathcal{E}_1$ . Let  $\mathbf{z}' \in \{0, 1\}^{kn}$  be an input to  $N_1$  such that  $\mathbf{z}' = \mathbf{z}^S$  for some hyperedge  $S$ . Thus, even  
 810 though  $N_1$  takes inputs in  $\mathbb{R}^{kn}$ , we consider now its behavior for an input  $\mathbf{z}'$  with discrete components  
 811 in  $\{0, 1\}$ . Fix some  $\mathbf{x} \in \{0, 1\}^n$ . Then, for  $S$  with  $P_{\mathbf{x}}(\mathbf{z}^S) = 0$  the inputs to all output neurons  $\mathcal{E}_1$   
 812 are at most  $-1$ , and for  $S$  with  $P_{\mathbf{x}}(\mathbf{z}^S) = 1$  there exists a neuron in  $\mathcal{E}_1$  with input at least 2. Recall  
 813 that our definition of a neuron's input includes the addition of the bias term. The construction of the  
 814 network  $N_1$  is given in Lemma A.2. Note that the network  $N_1$  depends on  $\mathbf{x}$ . Let  $N'_1 : \mathbb{R}^{kn} \rightarrow \mathbb{R}$   
 815 be a depth-2 neural network with no activation function in the output neuron, obtained from  $N_1$  by  
 816 summing the outputs from all neurons  $\mathcal{E}_1$ .

817 Let  $N_2$  be a depth-1 neural network (i.e., one layer, with activations in the output neurons) with  
 818 input dimension  $kn$ , at most  $2n$  output neurons, and parameter magnitudes bounded by  $n^3$  (for a  
 819 sufficiently large  $n$ ), which satisfies the following. We denote the set of output neurons of  $N_2$  by  $\mathcal{E}_2$ .  
 820 Let  $\mathbf{z}' \in \{0, 1\}^{kn}$  be an input to  $N_2$  (note that it has components only in  $\{0, 1\}$ ). If  $\mathbf{z}'$  is an encoding  
 821 of a hyperedge then the inputs to all output neurons  $\mathcal{E}_2$  are at most  $-1$ , and otherwise there exists  
 822 a neuron in  $\mathcal{E}_2$  with input at least 2. The construction of the network  $N_2$  is given in Lemma A.4.  
 823 Let  $N'_2 : \mathbb{R}^{kn} \rightarrow \mathbb{R}$  be a depth-2 neural network with no activation function in the output neuron,  
 824 obtained from  $N_2$  by summing the outputs from all neurons  $\mathcal{E}_2$ .

825 Let  $N' : \mathbb{R}^{kn} \rightarrow \mathbb{R}$  be a depth-2 network obtained from  $N'_1, N'_2$  as follows. For  $\mathbf{z}' \in \mathbb{R}^{kn}$  we  
 826 have  $N'(\mathbf{z}') = [1 - N'_1(\mathbf{z}') - N'_2(\mathbf{z}')]_+$ . The network  $N'$  has at most  $n^2$  neurons, and parameter  
 827 magnitudes bounded by  $n^3$  (all bounds are for a sufficiently large  $n$ ). Finally, let  $\tilde{N} : \mathbb{R}^{n^2} \rightarrow \mathbb{R}$  be a  
 828 depth-2 neural network such that  $\tilde{N}(\tilde{\mathbf{z}}) = N'(\tilde{\mathbf{z}}_{[kn]})$ .

## 829 C.2 Defining the noise magnitudes $\tau, \omega$ and analyzing the perturbed network under 830 perturbed inputs

831 In order to use the algorithm  $\mathcal{L}$  w.r.t. some neural network with parameters  $\theta$  and a certain input  
 832 distribution, we need to implement an examples oracle, such that the examples are drawn from a  
 833 smoothed input distribution, and labeled according to a neural network with parameters  $\theta + \xi$ , where  $\xi$   
 834 is a random perturbation. Specifically, we use  $\mathcal{L}$  with an examples oracle where the input distribution  
 835  $\hat{\mathcal{D}}$  is obtained from  $\mathcal{D}$  by smoothing, and the labels correspond to a network  $\hat{N} : \mathbb{R}^{n^2} \rightarrow \mathbb{R}$  obtained  
 836 from  $\tilde{N}$  (w.r.t. an appropriate  $\mathbf{x} \in \{0, 1\}^n$  in the construction of  $N_1$ ) by adding a small perturbation  
 837 to the parameters. The smoothing magnitudes  $\omega, \tau$  of the inputs and the network's parameters  
 838 (respectively) are such that the following hold.

839 We first choose the parameter  $\tau = 1/\text{poly}(n)$  as follows. Let  $f_{\theta} : \mathbb{R}^{n^2} \rightarrow \mathbb{R}$  be any depth-2  
 840 neural network parameterized by  $\theta \in \mathbb{R}^r$  for some  $r > 0$  with at most  $n^2$  neurons, and parameter  
 841 magnitudes bounded by  $n^3$  (note that  $r$  is polynomial in  $n$ ). Then,  $\tau$  is such that with probability at  
 842 least  $1 - \frac{1}{n}$  over  $\xi \sim \mathcal{N}(\mathbf{0}, \tau^2 I_r)$ , we have  $|\xi_i| \leq \frac{1}{10}$  for all  $i \in [r]$ , and the network  $f_{\theta+\xi}$  is such that

for every input  $\tilde{\mathbf{z}} \in \mathbb{R}^{n^2}$  with  $\|\tilde{\mathbf{z}}\| \leq n$  and every neuron we have: Let  $a, b$  be the inputs to the neuron in the computations  $f_{\theta}(\tilde{\mathbf{z}})$  and  $f_{\theta+\xi}(\tilde{\mathbf{z}})$  (respectively), then  $|a - b| \leq \frac{1}{4}$ . Thus,  $\tau$  is sufficiently small, such that w.h.p. adding i.i.d. noise  $\mathcal{N}(0, \tau^2)$  to each parameter does not change the inputs to the neurons by more than  $\frac{1}{4}$ . Note that such an inverse-polynomial  $\tau$  exists, since when the network size, parameter magnitudes, and input size are bounded by some  $\text{poly}(n)$ , then the input to each neuron in  $f_{\theta}(\tilde{\mathbf{z}})$  is  $\text{poly}(n)$ -Lipschitz as a function of  $\theta$ , and thus it suffices to choose  $\tau$  that implies with probability at least  $1 - \frac{1}{n}$  that  $\|\xi\| \leq \frac{1}{q(n)}$  for a sufficiently large polynomial  $q(n)$  (see Lemma A.7 for details).

Next, we choose the parameter  $\omega = 1/\text{poly}(n)$  as follows. Let  $f_{\theta} : \mathbb{R}^{n^2} \rightarrow \mathbb{R}$  be any depth-2 neural network parameterized by  $\theta$  with at most  $n^2$  neurons, and parameter magnitudes bounded by  $n^3 + \frac{1}{10}$ . Then,  $\omega$  is such that for every  $\mathbf{z} \in \{0, 1\}^{n^2}$ , with probability at least  $1 - \exp(-n/2)$  over  $\zeta \sim \mathcal{N}(\mathbf{0}, \omega^2 I_{n^2})$  the following holds for every neuron in the  $f_{\theta}$ : Let  $a, b$  be the inputs to the neuron in the computations  $f_{\theta}(\mathbf{z})$  and  $f_{\theta}(\mathbf{z} + \zeta)$  (respectively), then  $|a - b| \leq \frac{1}{4}$ . Thus,  $\omega$  is sufficiently small, such that w.h.p. adding noise  $\mathcal{N}(\mathbf{0}, \omega^2 I_{n^2})$  to the input  $\mathbf{z}$  does not change the inputs to the neurons by more than  $\frac{1}{4}$ . Note that such an inverse-polynomial  $\omega$  exists, since when the network size and parameter magnitudes are bounded by some  $\text{poly}(n)$ , then the input to each neuron in  $f_{\theta}(\mathbf{z})$  is  $\text{poly}(n)$ -Lipschitz as a function of  $\mathbf{z}$ , and thus it suffices to choose  $\omega$  that implies with probability at least  $1 - \exp(-n/2)$  that  $\|\zeta\| \leq \frac{1}{q(n)}$  for a sufficiently large polynomial  $q(n)$  (see Lemma A.7 for details).

Let  $\tilde{\theta} \in \mathbb{R}^p$  be the parameters of the network  $\tilde{N}$ . Recall that the parameters vector  $\tilde{\theta}$  is the concatenation of all weight matrices and bias terms. Let  $\hat{\theta} \in \mathbb{R}^p$  be the parameters of  $\hat{N}$ , namely,  $\hat{\theta} = \tilde{\theta} + \xi$  where  $\xi \sim \mathcal{N}(\mathbf{0}, \tau^2 I_p)$ . By our choice of  $\tau$  and the construction of the networks  $N_1, N_2$ , with probability at least  $1 - \frac{1}{n}$  over  $\xi$ , for every  $\mathbf{z} \in \{0, 1\}^{n^2}$  the following holds: Let  $\zeta \sim \mathcal{N}(\mathbf{0}, \omega^2 I_{n^2})$  and let  $\hat{\mathbf{z}} = \mathbf{z} + \zeta$ . Then with probability at least  $1 - \exp(-n/2)$  over  $\zeta$  the differences between inputs to all neurons in the computations  $\hat{N}(\hat{\mathbf{z}})$  and  $\tilde{N}(\mathbf{z})$  are at most  $\frac{1}{2}$ . Indeed, w.h.p. for all  $\mathbf{z} \in \{0, 1\}^{n^2}$  the computations  $\tilde{N}(\mathbf{z})$  and  $\hat{N}(\mathbf{z})$  are roughly similar (up to change of  $1/4$  in the input to each neuron), and w.h.p. the computations  $\hat{N}(\mathbf{z})$  and  $\hat{N}(\hat{\mathbf{z}})$  are roughly similar (up to change of  $1/4$  in the input to each neuron). Thus, with probability at least  $1 - \frac{1}{n}$  over  $\xi$ , the network  $\hat{N}$  is such that for every  $\mathbf{z} \in \{0, 1\}^{n^2}$ , we have with probability at least  $1 - \exp(-n/2)$  over  $\zeta$  that the computation  $\hat{N}(\hat{\mathbf{z}})$  satisfies the following properties, where  $\mathbf{z}' := \mathbf{z}_{[kn]}$ :

- (Q1) If  $\mathbf{z}' = \mathbf{z}^S$  for some hyperedge  $S$ , then the inputs to  $\mathcal{E}_1$  satisfy:
  - If  $P_{\mathbf{x}}(\mathbf{z}^S) = 0$  the inputs to all neurons in  $\mathcal{E}_1$  are at most  $-\frac{1}{2}$ .
  - If  $P_{\mathbf{x}}(\mathbf{z}^S) = 1$  there exists a neuron in  $\mathcal{E}_1$  with input at least  $\frac{3}{2}$ .
- (Q2) The inputs to  $\mathcal{E}_2$  satisfy:
  - If  $\mathbf{z}'$  is an encoding of a hyperedge then the inputs to all neurons  $\mathcal{E}_2$  are at most  $-\frac{1}{2}$ .
  - Otherwise, there exists a neuron in  $\mathcal{E}_2$  with input at least  $\frac{3}{2}$ .

### C.3 Stating the algorithm $\mathcal{A}$

Given a sequence  $(S_1, y_1), \dots, (S_{n^s}, y_{n^s})$ , where  $S_1, \dots, S_{n^s}$  are i.i.d. random hyperedges, the algorithm  $\mathcal{A}$  needs to distinguish whether  $\mathbf{y} = (y_1, \dots, y_{n^s})$  is random or that  $\mathbf{y} = (P(\mathbf{x}_{S_1}), \dots, P(\mathbf{x}_{S_{n^s}})) = (P_{\mathbf{x}}(\mathbf{z}^{S_1}), \dots, P_{\mathbf{x}}(\mathbf{z}^{S_{n^s}}))$  for a random  $\mathbf{x} \in \{0, 1\}^n$ . Let  $\mathcal{S} = ((\mathbf{z}^{S_1}, y_1), \dots, (\mathbf{z}^{S_{n^s}}, y_{n^s}))$ .

We use the efficient algorithm  $\mathcal{L}$  in order to obtain distinguishing advantage greater than  $\frac{1}{3}$  as follows. Let  $\xi$  be a random perturbation, and let  $\hat{N}$  be the perturbed network as defined above, w.r.t. the unknown  $\mathbf{x} \in \{0, 1\}^n$ . Note that given a perturbation  $\xi$ , only the weights in the second layer of the subnetwork  $N_1$  in  $\hat{N}$  are unknown, since all other parameters do not depend on  $\mathbf{x}$ . The algorithm  $\mathcal{A}$  runs  $\mathcal{L}$  with the following examples oracle. In the  $i$ -th call, the oracle first draws  $\mathbf{z}' \in \{0, 1\}^{kn}$  such that each component is drawn i.i.d. from a Bernoulli distribution which takes the value 0 with probability  $\frac{1}{n}$ . If  $\mathbf{z}'$  is an encoding of a hyperedge then the oracle replaces  $\mathbf{z}'$  with  $\mathbf{z}^{S_i}$ . Let  $\mathbf{z} \in \{0, 1\}^{n^2}$  be such that  $\mathbf{z}_{[kn]} = \mathbf{z}'$ , and the other  $n^2 - kn$  components of  $\mathbf{z}$  are drawn i.i.d. from

a Bernoulli distribution which takes the value 0 with probability  $\frac{1}{n}$ . Note that the vector  $\mathbf{z}$  has the distribution  $\mathcal{D}$ , since replacing an encoding of a random hyperedge by an encoding of another random hyperedge does not change the distribution of  $\mathbf{z}'$ . Let  $\hat{\mathbf{z}} = \mathbf{z} + \boldsymbol{\zeta}$ , where  $\boldsymbol{\zeta} \sim \mathcal{N}(\mathbf{0}, \omega^2 I_{n^2})$ . Note that  $\hat{\mathbf{z}}$  has the distribution  $\hat{\mathcal{D}}$ . Let  $\hat{b} \in \mathbb{R}$  be the bias term of the output neuron of  $\hat{N}$ . The oracle returns  $(\hat{\mathbf{z}}, \hat{y})$ , where the labels  $\hat{y}$  are chosen as follows:

- If  $\mathbf{z}'$  is not an encoding of a hyperedge, then  $\hat{y} = 0$ .
- If  $\mathbf{z}'$  is an encoding of a hyperedge:
  - If  $y_i = 0$  we set  $\hat{y} = \hat{b}$ .
  - If  $y_i = 1$  we set  $\hat{y} = 0$ .

Let  $h$  be the hypothesis returned by  $\mathcal{L}$ . Recall that  $\mathcal{L}$  uses at most  $m(n)$  examples, and hence  $\mathcal{S}$  contains at least  $n^3$  examples that  $\mathcal{L}$  cannot view. We denote the indices of these examples by  $I = \{m(n) + 1, \dots, m(n) + n^3\}$ , and the examples by  $\mathcal{S}_I = \{(\mathbf{z}^{S_i}, y_i)\}_{i \in I}$ . By  $n^3$  additional calls to the oracle, the algorithm  $\mathcal{A}$  obtains the examples  $\hat{\mathcal{S}}_I = \{(\hat{\mathbf{z}}_i, \hat{y}_i)\}_{i \in I}$  that correspond to  $\mathcal{S}_I$ . Let  $h'$  be a hypothesis such that for all  $\tilde{\mathbf{z}} \in \mathbb{R}^{n^2}$  we have  $h'(\tilde{\mathbf{z}}) = \max\{0, \min\{\hat{b}, h(\tilde{\mathbf{z}})\}\}$ , thus, for  $\hat{b} \geq 0$  the hypothesis  $h'$  is obtained from  $h$  by clipping the output to the interval  $[0, \hat{b}]$ . Let  $\ell_I(h') = \frac{1}{|I|} \sum_{i \in I} (h'(\hat{\mathbf{z}}_i) - \hat{y}_i)^2$ . Now, if  $\ell_I(h') \leq \frac{2}{n}$ , then  $\mathcal{A}$  returns 1, and otherwise it returns 0. We remark that the decision of our algorithm is based on  $h'$  (rather than  $h$ ) since we need the outputs to be bounded, in order to allow using Hoeffding's inequality in our analysis, which we discuss in the next subsection.

#### C.4 Analyzing the algorithm $\mathcal{A}$

Note that the algorithm  $\mathcal{A}$  runs in  $\text{poly}(n)$  time. We now show that if  $\mathcal{S}$  is pseudorandom then  $\mathcal{A}$  returns 1 with probability greater than  $\frac{2}{3}$ , and if  $\mathcal{S}$  is random then  $\mathcal{A}$  returns 1 with probability less than  $\frac{1}{3}$ . To that end, we use similar arguments to the proof of Theorem 3.1.

In Lemma C.1, we show that if  $\mathcal{S}$  is pseudorandom then with probability at least  $\frac{39}{40}$  (over  $\boldsymbol{\xi} \sim \mathcal{N}(\mathbf{0}, \tau^2 I_p)$  and  $\boldsymbol{\zeta}_i \sim \mathcal{N}(\mathbf{0}, \omega^2 I_{n^2})$  for all  $i \in [m(n)]$ ) the examples  $(\hat{\mathbf{z}}_1, \hat{y}_1), \dots, (\hat{\mathbf{z}}_{m(n)}, \hat{y}_{m(n)})$  returned by the oracle are realized by  $\hat{N}$ . Recall that the algorithm  $\mathcal{L}$  is such that with probability at least  $\frac{3}{4}$  (over  $\boldsymbol{\xi} \sim \mathcal{N}(\mathbf{0}, \tau^2 I_p)$ , the i.i.d. inputs  $\hat{\mathbf{z}}_i \sim \hat{\mathcal{D}}$ , and possibly its internal randomness), given a size- $m(n)$  dataset labeled by  $\hat{N}$ , it returns a hypothesis  $h$  such that  $\mathbb{E}_{\hat{\mathbf{z}} \sim \hat{\mathcal{D}}} [(h(\hat{\mathbf{z}}) - \hat{N}(\hat{\mathbf{z}}))^2] \leq \frac{1}{n}$ . Hence, with probability at least  $\frac{3}{4} - \frac{1}{40}$  the algorithm  $\mathcal{L}$  returns such a good hypothesis  $h$ , given  $m(n)$  examples labeled by our examples oracle. Indeed, note that  $\mathcal{L}$  can return a bad hypothesis only if the random choices are either bad for  $\mathcal{L}$  (when used with realizable examples) or bad for the realizability of the examples returned by our oracle. By the definition of  $h'$  and the construction of  $\hat{N}$ , if  $h$  has small error then  $h'$  also has small error, namely,

$$\mathbb{E}_{\hat{\mathbf{z}} \sim \hat{\mathcal{D}}} [(h'(\hat{\mathbf{z}}) - \hat{N}(\hat{\mathbf{z}}))^2] \leq \mathbb{E}_{\hat{\mathbf{z}} \sim \hat{\mathcal{D}}} [(h(\hat{\mathbf{z}}) - \hat{N}(\hat{\mathbf{z}}))^2] \leq \frac{1}{n}.$$

Let  $\hat{\ell}_I(h') = \frac{1}{|I|} \sum_{i \in I} (h'(\hat{\mathbf{z}}_i) - \hat{N}(\hat{\mathbf{z}}_i))^2$ . Recall that by our choice of  $\tau$  we have  $\Pr[\hat{b} > \frac{11}{10}] \leq \frac{1}{n}$ . Since,  $(h'(\hat{\mathbf{z}}) - \hat{N}(\hat{\mathbf{z}}))^2 \in [0, \hat{b}^2]$  for all  $\hat{\mathbf{z}} \in \mathbb{R}^{n^2}$ , by Hoeffding's inequality, we have for a sufficiently large  $n$  that

$$\begin{aligned} \Pr \left[ \left| \hat{\ell}_I(h') - \mathbb{E}_{\hat{\mathcal{S}}_I} \hat{\ell}_I(h') \right| \geq \frac{1}{n} \right] &= \Pr \left[ \left| \hat{\ell}_I(h') - \mathbb{E}_{\hat{\mathcal{S}}_I} \hat{\ell}_I(h') \right| \geq \frac{1}{n} \mid \hat{b} \leq \frac{11}{10} \right] \cdot \Pr \left[ \hat{b} \leq \frac{11}{10} \right] \\ &\quad + \Pr \left[ \left| \hat{\ell}_I(h') - \mathbb{E}_{\hat{\mathcal{S}}_I} \hat{\ell}_I(h') \right| \geq \frac{1}{n} \mid \hat{b} > \frac{11}{10} \right] \cdot \Pr \left[ \hat{b} > \frac{11}{10} \right] \\ &\leq 2 \exp \left( -\frac{2n^3}{n^2(11/10)^4} \right) \cdot 1 + 1 \cdot \frac{1}{n} \\ &\leq \frac{1}{40}. \end{aligned}$$

928 Moreover, by Lemma C.1,

$$\Pr \left[ \ell_I(h') \neq \hat{\ell}_I(h') \right] \leq \Pr \left[ \exists i \in I \text{ s.t. } \hat{y}_i \neq \hat{N}(\hat{\mathbf{z}}_i) \right] \leq \frac{1}{40}.$$

929 Overall, by the union bound we have with probability at least  $1 - \left( \frac{1}{4} + \frac{1}{40} + \frac{1}{40} + \frac{1}{40} \right) > \frac{2}{3}$  for  
930 sufficiently large  $n$  that:

931  $\bullet \mathbb{E}_{\hat{\mathcal{S}}_I} \hat{\ell}_I(h') = \mathbb{E}_{\hat{\mathbf{z}} \sim \hat{\mathcal{D}}} \left[ (h'(\hat{\mathbf{z}}) - \hat{N}(\hat{\mathbf{z}}))^2 \right] \leq \frac{1}{n}.$

932  $\bullet \left| \hat{\ell}_I(h') - \mathbb{E}_{\hat{\mathcal{S}}_I} \hat{\ell}_I(h') \right| \leq \frac{1}{n}.$

933  $\bullet \ell_I(h') - \hat{\ell}_I(h') = 0.$

934 Combining the above, we get that if  $\mathcal{S}$  is pseudorandom, then with probability greater than  $\frac{2}{3}$  we have

$$\ell_I(h') = \left( \ell_I(h') - \hat{\ell}_I(h') \right) + \left( \hat{\ell}_I(h') - \mathbb{E}_{\hat{\mathcal{S}}_I} \hat{\ell}_I(h') \right) + \mathbb{E}_{\hat{\mathcal{S}}_I} \hat{\ell}_I(h') \leq 0 + \frac{1}{n} + \frac{1}{n} = \frac{2}{n}.$$

935 We now consider the case where  $\mathcal{S}$  is random. For an example  $\hat{\mathbf{z}}_i = \mathbf{z}_i + \boldsymbol{\zeta}_i$  returned by the oracle,  
936 we denote  $\mathbf{z}'_i = (\mathbf{z}_i)_{[kn]} \in \{0, 1\}^{kn}$ . Thus,  $\mathbf{z}'_i$  is the input that the oracle used before adding the  
937  $n^2 - kn$  additional components and adding noise  $\boldsymbol{\zeta}_i$ . Let  $\mathcal{Z}' \subseteq \{0, 1\}^{kn}$  be such that  $\mathbf{z}' \in \mathcal{Z}'$  iff  
938  $\mathbf{z}' = \mathbf{z}^S$  for some hyperedge  $S$ . If  $\mathcal{S}$  is random, then by the definition of our examples oracle, for  
939 every  $i \in [m(n) + n^3]$  such that  $\mathbf{z}'_i \in \mathcal{Z}'$ , we have  $\hat{y}_i = \hat{b}$  with probability  $\frac{1}{2}$  and  $\hat{y}_i = 0$  otherwise.  
940 Also, by the definition of the oracle,  $\hat{y}_i$  is independent of  $\mathcal{S}_i$ , independent of the  $n^2 - kn$  additional  
941 components that were added, and independent of the noise  $\boldsymbol{\zeta}_i \sim \mathcal{N}(\mathbf{0}, \omega^2 I_{n^2})$  that corresponds to  
942  $\hat{\mathbf{z}}_i$ .

943 If  $\hat{b} \geq \frac{9}{10}$  then for a sufficiently large  $n$  the hypothesis  $h'$  satisfies for each random example  
944  $(\hat{\mathbf{z}}_i, \hat{y}_i) \in \hat{\mathcal{S}}_I$  the following:

$$\begin{aligned} & \Pr_{(\hat{\mathbf{z}}_i, \hat{y}_i)} \left[ (h'(\hat{\mathbf{z}}_i) - \hat{y}_i)^2 \geq \frac{1}{5} \right] \\ & \geq \Pr_{(\hat{\mathbf{z}}_i, \hat{y}_i)} \left[ (h'(\hat{\mathbf{z}}_i) - \hat{y}_i)^2 \geq \frac{1}{5} \mid \mathbf{z}'_i \in \mathcal{Z}' \right] \cdot \Pr[\mathbf{z}'_i \in \mathcal{Z}'] \\ & \geq \Pr_{(\hat{\mathbf{z}}_i, \hat{y}_i)} \left[ (h'(\hat{\mathbf{z}}_i) - \hat{y}_i)^2 \geq \left( \frac{\hat{b}}{2} \right)^2 \mid \mathbf{z}'_i \in \mathcal{Z}' \right] \cdot \Pr[\mathbf{z}'_i \in \mathcal{Z}'] \\ & \geq \frac{1}{2} \cdot \Pr[\mathbf{z}'_i \in \mathcal{Z}'] . \end{aligned}$$

945 In Lemma A.10, we show that for a sufficiently large  $n$  we have  $\Pr[\mathbf{z}'_i \in \mathcal{Z}'] \geq \frac{1}{\log(n)}$ . Hence,

$$\Pr_{(\hat{\mathbf{z}}_i, \hat{y}_i)} \left[ (h'(\hat{\mathbf{z}}_i) - \hat{y}_i)^2 \geq \frac{1}{5} \right] \geq \frac{1}{2} \cdot \frac{1}{\log(n)} \geq \frac{1}{2 \log(n)}.$$

946 Thus, if  $\hat{b} \geq \frac{9}{10}$  then we have

$$\mathbb{E}_{\hat{\mathcal{S}}_I} [\ell_I(h')] \geq \frac{1}{5} \cdot \frac{1}{2 \log(n)} = \frac{1}{10 \log(n)}.$$

947 Therefore, for large  $n$  we have

$$\Pr \left[ \mathbb{E}_{\hat{\mathcal{S}}_I} [\ell_I(h')] \geq \frac{1}{10 \log(n)} \right] \geq 1 - \frac{1}{n} \geq \frac{7}{8}.$$

Since,  $(h'(\hat{\mathbf{z}}) - \hat{y})^2 \in [0, \hat{b}^2]$  for all  $\hat{\mathbf{z}}, \hat{y}$  returned by the examples oracle, and the examples  $\hat{\mathbf{z}}_i$  for  $i \in I$  are i.i.d., then by Hoeffding's inequality, we have for a sufficiently large  $n$  that

$$\begin{aligned} \Pr \left[ \left| \ell_I(h') - \mathbb{E}_{\hat{S}_I} \ell_I(h') \right| \geq \frac{1}{n} \right] &= \Pr \left[ \left| \ell_I(h') - \mathbb{E}_{\hat{S}_I} \ell_I(h') \right| \geq \frac{1}{n} \mid \hat{b} \leq \frac{11}{10} \right] \cdot \Pr \left[ \hat{b} \leq \frac{11}{10} \right] \\ &\quad + \Pr \left[ \left| \ell_I(h') - \mathbb{E}_{\hat{S}_I} \ell_I(h') \right| \geq \frac{1}{n} \mid \hat{b} > \frac{11}{10} \right] \cdot \Pr \left[ \hat{b} > \frac{11}{10} \right] \\ &\leq 2 \exp \left( -\frac{2n^3}{n^2(11/10)^4} \right) \cdot 1 + 1 \cdot \frac{1}{n} \\ &\leq \frac{1}{8}. \end{aligned}$$

Hence, for large enough  $n$ , with probability at least  $1 - \frac{1}{8} - \frac{1}{8} = \frac{3}{4} > \frac{2}{3}$  we have both  $\mathbb{E}_{\hat{S}_I} [\ell_I(h')] \geq \frac{1}{10 \log(n)}$  and  $\left| \ell_I(h') - \mathbb{E}_{\hat{S}_I} \ell_I(h') \right| \leq \frac{1}{n}$ , and thus

$$\ell_I(h') \geq \frac{1}{10 \log(n)} - \frac{1}{n} > \frac{2}{n}.$$

Overall, if  $\mathcal{S}$  is pseudorandom then with probability greater than  $\frac{2}{3}$  the algorithm  $\mathcal{A}$  returns 1, and if  $\mathcal{S}$  is random then with probability greater than  $\frac{2}{3}$  the algorithm  $\mathcal{A}$  returns 0. Thus, the distinguishing advantage is greater than  $\frac{1}{3}$ . This concludes the proof of the theorem. It remains to prove the deferred lemma on the realizability of the examples returned by the examples oracle:

**Lemma C.1.** *If  $\mathcal{S}$  is pseudorandom then with probability at least  $\frac{39}{40}$  over  $\boldsymbol{\xi} \sim \mathcal{N}(\mathbf{0}, \tau^2 I_p)$  and  $\boldsymbol{\zeta}_i \sim \mathcal{N}(\mathbf{0}, \omega^2 I_{n^2})$  for  $i \in [m(n) + n^3]$ , the examples  $(\hat{\mathbf{z}}_1, \hat{y}_1), \dots, (\hat{\mathbf{z}}_{m(n)+n^3}, \hat{y}_{m(n)+n^3})$  returned by the oracle are realized by  $\hat{N}$ .*

*Proof.* By our choice of  $\tau$  and  $\omega$  and the construction of  $N_1, N_2$ , with probability at least  $1 - \frac{1}{n}$  over  $\boldsymbol{\xi} \sim \mathcal{N}(\mathbf{0}, \tau^2 I_p)$ , we have  $|\xi_j| \leq \frac{1}{10}$  for all  $j \in [p]$ , and for every  $\mathbf{z} \in \{0, 1\}^{n^2}$  the following holds: Let  $\boldsymbol{\zeta} \sim \mathcal{N}(\mathbf{0}, \omega^2 I_{n^2})$  and let  $\hat{\mathbf{z}} = \mathbf{z} + \boldsymbol{\zeta}$ . Then with probability at least  $1 - \exp(-n/2)$  over  $\boldsymbol{\zeta}$  the inputs to the neurons  $\mathcal{E}_1, \mathcal{E}_2$  in the computation  $\hat{N}(\hat{\mathbf{z}})$  satisfy Properties (Q1) and (Q2). Hence, with probability at least  $1 - \frac{1}{n} - (m(n) + n^3) \exp(-n/2) \geq 1 - \frac{2}{n}$  (for a sufficiently large  $n$ ),  $|\xi_j| \leq \frac{1}{10}$  for all  $j \in [p]$ , and Properties (Q1) and (Q2) hold for the computations  $\hat{N}(\hat{\mathbf{z}}_i)$  for all  $i \in [m(n) + n^3]$ . It remains to show that if  $|\xi_j| \leq \frac{1}{10}$  for all  $j \in [p]$  and Properties (Q1) and (Q2) hold, then the examples  $(\hat{\mathbf{z}}_1, \hat{y}_1), \dots, (\hat{\mathbf{z}}_{m(n)+n^3}, \hat{y}_{m(n)+n^3})$  are realized by  $\hat{N}$ .

Let  $i \in [m(n) + n^3]$ . We denote  $\hat{\mathbf{z}}_i = \mathbf{z}_i + \boldsymbol{\zeta}_i$ , namely, the  $i$ -th example returned by the oracle was obtained by adding noise  $\boldsymbol{\zeta}_i$  to  $\mathbf{z}_i \in \{0, 1\}^{n^2}$ . We also denote  $\mathbf{z}'_i = (\mathbf{z}_i)_{[kn]} \in \{0, 1\}^{kn}$ . Since  $|\xi_j| \leq \frac{1}{10}$  for all  $j \in [p]$ , and all incoming weights to the output neuron in  $\hat{N}$  are  $-1$ , then in  $\hat{N}$  all incoming weights to the output neuron are in  $[-\frac{11}{10}, -\frac{9}{10}]$ , and the bias term in the output neuron, denoted by  $\hat{b}$ , is in  $[\frac{9}{10}, \frac{11}{10}]$ . Consider the following cases:

- If  $\mathbf{z}'_i$  is not an encoding of a hyperedge then  $\hat{y}_i = 0$ . Moreover, in the computation  $\hat{N}(\hat{\mathbf{z}}_i)$ , there exists a neuron in  $\mathcal{E}_2$  with output at least  $\frac{3}{2}$  (by Property (Q2)). Since all incoming weights to the output neuron in  $\hat{N}$  are in  $[-\frac{11}{10}, -\frac{9}{10}]$ , and  $\hat{b} \in [\frac{9}{10}, \frac{11}{10}]$ , then the input to the output neuron (including the bias term) is at most  $\frac{11}{10} - \frac{3}{2} \cdot \frac{9}{10} < 0$ , and thus its output is 0.
- If  $\mathbf{z}'_i$  is an encoding of a hyperedge  $S$ , then by the definition of the examples oracle we have  $S = S_i$ . Hence:
  - If  $y_i = 0$  then the oracle sets  $\hat{y}_i = \hat{b}$ . Since  $\mathcal{S}$  is pseudorandom, we have  $P_{\mathbf{x}}(\mathbf{z}^S) = P_{\mathbf{x}}(\mathbf{z}^{S_i}) = y_i = 0$ . Hence, in the computation  $\hat{N}(\hat{\mathbf{z}}_i)$  the inputs to all neurons in  $\mathcal{E}_1, \mathcal{E}_2$  are at most  $-\frac{1}{2}$  (by Properties (Q1) and (Q2)), and thus their outputs are 0. Therefore,  $\hat{N}(\hat{\mathbf{z}}_i) = \hat{b}$ .

983 – If  $y_i = 1$  then the oracle sets  $\hat{y}_i = 0$ . Since  $\mathcal{S}$  is pseudorandom, we have  $P_{\mathbf{x}}(\mathbf{z}^S) =$   
 984  $P_{\mathbf{x}}(\mathbf{z}^{S_i}) = y_i = 1$ . Hence, in the computation  $\hat{N}(\hat{\mathbf{z}}_i)$  there exists a neuron in  $\mathcal{E}_1$  with  
 985 output at least  $\frac{3}{2}$  (by Property (Q1)). Since all incoming weights to the output neuron  
 986 in  $\hat{N}$  are in  $[-\frac{11}{10}, -\frac{9}{10}]$ , and  $\hat{b} \in [\frac{9}{10}, \frac{11}{10}]$ , then the input to output neuron (including  
 987 the bias term) is at most  $\frac{11}{10} - \frac{3}{2} \cdot \frac{9}{10} < 0$ , and thus its output is 0.

988

□
